# Supplementary material for: Tuberculosis and other opportunistic infections in tofacitinib-treated patients with rheumatoid arthritis
Source: PubMed Central journal article supplement (PMC4893093; doi:10.1136/annrheumdis-2015-207319), 2015-08-28
Supplement: annrheumdis-2015-207319-s1.pdf [file annrheumdis-2015-207319-s1.pdf]

## Supplementary Appendix

### **Tuberculosis and other opportunistic infections in tofacitinib-treated rheumatoid arthritis patients**

<sup>1</sup>Winthrop KL, <sup>2</sup>Park S-H, <sup>3</sup>Gul A, <sup>4</sup>Cardiel M, <sup>5</sup>Gomez-Reino JJ, <sup>6</sup>Tanaka Y, <sup>7</sup>Kwok K, <sup>7</sup>Lukic T, <sup>8</sup>Mortenson E, <sup>7</sup>Ponce de Leon D, <sup>7</sup>Riese R, <sup>9</sup>Valdez H

<sup>1</sup>*Oregon Health and Science University, Portland, Oregon, USA;*

<sup>2</sup>*Seoul St. Mary's Hospital, The Catholic University of Korea, South Korea;*

<sup>3</sup>*Istanbul Faculty of Medicine, Istanbul University, Istanbul, Turkey;*

<sup>4</sup>*Centro de Investigación Clínica de Morelia SC, Morelia, Mexico;*

<sup>5</sup>*Hospital Clinico Universitario de Santiago, Santiago de Compostela, Spain;*

<sup>6</sup>*University of Occupational and Environmental Health, Kitakyushu, Japan;*

<sup>7</sup>*Pfizer Inc, Groton, CT, USA.*

<sup>8</sup>*Pfizer Inc, New York, NY, USA*

<sup>9</sup>*Pfizer Inc, Collegeville, Pennsylvania, USA.*

## Supplementary file 1 – MedDRA search terms for case finding

### Opportunistic Infections (ADJUDICATED)

1. Treated Subject
2. Event started on or after start of study med treatment
3. Event is one of these preferred terms for P2P3 and pid^= 'A3921064 1037 10371006':
  - a. ESOPHAGEAL CANDIDIASIS
  - b. SIALOADENITIS
  - c. PNEUMOCYSTIS JIROVECI PNEUMONIA
  - d. CMV VIREMIA
  - e. CYTOMEGALOVIRUS VIRAEMIA
  - f. PNEUMONIA CRYPTOCOCCAL
  - g. HERPES ZOSTER DISSEMINATED
  - h. LYMPH NODE TUBERCULOSIS
  - i. TUBERCULOUS PLEURISY
  - j. PULMONARY TUBERCULOSIS
4. Event is one of these preferred terms for LTE:
  - a. Cytomegalovirus Infection (10011831)
  - b. Encephalitis (10014581)
  - c. Hepatitis acute (10019727)
  - d. Meningitis cryptococcal (10027209)
  - e. Oesophageal candidiasis (10030154)
  - f. Mycobacterium avium complex infection (10058806)
  - g. Atypical mycobacterial infection (10061663)
  - h. Pneumocystis jirovecii pneumonia (10064108)
  - i. Disseminated tuberculosis (10013453)
  - j. Tuberculosis (10044755)
  - k. Bone tuberculosis (10056377)
  - l. Tuberculosis of central nervous system (10061391)
  - m. Pulmonary tuberculosis (10037440)
  - n. Encephalitis (10014581)

- o. Hepatitis acute (10019727)
- p. Pneumonia (10035664) and pid in A3921024 1145 11451015 or A3921041 1005 10051007

Code:

P2P3: if factdat^=. and aefdate>=factdat and upcase(preftext) in ('OESOPHAGEAL CANDIDIASIS', 'SIALOADENITIS', 'PNEUMOCYSTIS JIROVECI PNEUMONIA', 'CMV VIREMIA', 'CYTOMEGALOVIRUS VIRAEMIA', 'PNEUMONIA CRYPTOCOCCAL', 'HERPES ZOSTER DISSEMINATED', 'LYMPH NODE TUBERCULOSIS', 'TUBERCULOUS PLEURISY', 'PULMONARY TUBERCULOSIS') and upcase(pid) not in ("A3921064 1037 10371006")

LTE: if factdat^=. and aefdate>=factdat and (prefcode in (10011831, 10014581, 10019727, 10027209, 10030154, 10058806, 10061663, 10064108, 10013453, 10044755, 10056377, 10061391, 10037440, 10014581, 10019727) or (PID in ("A3921024 1145 11451015","A3921041 1005 10051007") and prefcode in (10035664)))

NOTE – aeser=1 can be added for Serious Opportunistic Infections

**Supplementary file 2 – Crude incidence rate of OIs (TB and non-TB OIs combined) across various data within the tofacitinib developmental program<sup>a</sup> for rheumatoid arthritis**

| <b>Factor</b>          | <b>Strata</b> | <b>OI cases (n)</b> | <b>Crude incidence rate<br/>(95% CI)<sup>b</sup></b> |
|------------------------|---------------|---------------------|------------------------------------------------------|
| Age                    | <65 years     | 48                  | 0.44 (0.33, 0.58)                                    |
|                        | ≥65 years     | 10                  | 0.58 (0.31, 1.07)                                    |
| Sex                    | Male          | 6                   | 0.28 (0.13, 0.63)                                    |
|                        | Female        | 52                  | 0.49 (0.38, 0.65)                                    |
| Glucocorticoids        | No            | 21                  | 0.38 (0.25, 0.58)                                    |
|                        | Yes           | 37                  | 0.52 (0.38, 0.72)                                    |
| TB region <sup>c</sup> | Low           | 7                   | 0.14 (0.07, 0.30)                                    |
|                        | Medium        | 23                  | 0.46 (0.31, 0.69)                                    |
|                        | High          | 28                  | 1.01 (0.69, 1.46)                                    |

<sup>a</sup>Phase 2, 3 and long-term extension study data

<sup>b</sup>per 100 patient-years of exposure

<sup>c</sup>Based on WHO background incidence

CI, confidence interval; OI, opportunistic infection; TB, tuberculosis

### Supplementary file 3 – Characteristics of the 26 reported active TB cases from Phase 2, 3, and LTE studies of tofacitinib

| Tofacitinib dose | Country     | Age at time of TB onset | Sex | Days to onset | Meets CDC TB criteria <sup>a</sup> | TB location          | TB screening                              | Bacteriology                             | Methotrexate | Prednisone | Other                                                      |
|------------------|-------------|-------------------------|-----|---------------|------------------------------------|----------------------|-------------------------------------------|------------------------------------------|--------------|------------|------------------------------------------------------------|
| 10 mg BID        | Thailand    | 43                      | M   | 104           | Yes                                | Disseminated         | QFT negative                              | Sputum TB PCR+                           | No           | No         | Pericardial, pulmonary, lymph node involvement             |
| 10 mg BID        | India       | 48                      | M   | 152           | Yes                                | Pulmonary            | QFT indeterminate and TST negative (0 mm) | None                                     | No           | No         | Pleural effusion                                           |
| 5 mg BID         | USA         | 73                      | F   | 196           | Yes                                | Disseminated TB      | QFT negative                              | Positive DNA M Tb and M avium            | No           | Yes        | None                                                       |
| 10 mg BID        | Thailand    | 51                      | F   | 201           | No                                 | Pulmonary            | QFT positive; history of treated TB       | Positive AFB sputum smear                | Yes          | No         | No culture information; history of infected bronchiectasis |
| 5 mg BID         | Mexico      | 42                      | F   | 240           | Yes                                | Disseminated TB      | TST negative (0 mm)                       | Positive AFB smear from gastric aspirate | Yes          | No         | Negative culture and QuantiFERON <sup>®</sup> during event |
| 10 mg BID        | India       | 43                      | F   | 269           | Yes                                | Supraclavicular node | QFT negative                              | Lymph node biopsy “positive for TB”      | Yes          | No         | None                                                       |
| 10 mg BID        | Philippines | 67                      | F   | 290           | No                                 | Pulmonary            | QFT negative                              | Caseating granuloma on lung biopsy       | Unknown      | Unknown    | Diabetes                                                   |
| 10 mg BID        | Korea       | 63                      | M   | 305           | Yes                                | Pulmonary            | QFT negative                              | Positive AFB sputum smear                | Yes          | Yes        | No culture report                                          |

| <b>Tofacitinib dose</b> | <b>Country</b> | <b>Age at time of TB onset</b> | <b>Sex</b> | <b>Days to onset</b> | <b>Meets CDC TB criteria<sup>a</sup></b> | <b>TB location</b>  | <b>TB screening</b>                       | <b>Bacteriology</b>                           | <b>Methotrexate</b> | <b>Prednisone</b> | <b>Other</b>                                                                                               |
|-------------------------|----------------|--------------------------------|------------|----------------------|------------------------------------------|---------------------|-------------------------------------------|-----------------------------------------------|---------------------|-------------------|------------------------------------------------------------------------------------------------------------|
| 10 mg BID               | India          | 53                             | F          | 325                  | Yes                                      | Bone                | QFT negative                              | None                                          | No                  | No                | Necrotizing granuloma on bone biopsy. No cultures                                                          |
| 10 mg BID               | China          | 51                             | M          | 325                  | Yes                                      | Pulmonary           | QFT negative                              | Positive AFB sputum smear                     | Yes                 | No                | No culture, also leflunomide                                                                               |
| 10 mg BID               | Philippines    | 73                             | F          | 366                  | Yes                                      | Pulmonary           | QFT negative                              | None                                          | Yes                 | No                | Pleural effusion                                                                                           |
| 5 mg BID then 10 mg BID | Philippines    | 71                             | F          | 421                  | No                                       | Pulmonary           | QFT negative                              | None                                          | Yes                 | No                | None                                                                                                       |
| 10 mg BID               | Korea          | 55                             | F          | 443                  | Yes                                      | Pericardial/pleural | QFT negative                              | Pleural fluid AFB culture negative            | No                  | No                | QFT became positive in context of pleural effusion showing lymphocyte dominant exudates with ADA elevation |
| 10 mg BID               | Philippines    | 43                             | F          | 446                  | Yes                                      | Pulmonary           | QFT indeterminate and PPD negative (0 mm) | Negative AFB sputum smear                     | No                  | Yes               | None                                                                                                       |
| 10 mg BID               | Korea          | 62                             | F          | 546                  | Yes                                      | Disseminated        | QFT negative                              | TB PCR+ lymph node                            | Yes                 | Yes               |                                                                                                            |
| 5 mg BID                | China          | 27                             | F          | 588                  | Yes                                      | Disseminated        | QFT negative                              | none                                          | Yes                 | Yes               | Chest CT with milia, septic knee                                                                           |
| 5 mg BID                | Japan          | 59                             | F          | 618                  | Yes                                      | Pulmonary           | QFT negative                              | Sputum TB culture positive                    | No                  | No                |                                                                                                            |
| 10 mg BID               | Philippines    | 62                             | F          | 778                  | No                                       | Pulmonary           | QFT negative                              | Unknown                                       | Yes                 | Yes               |                                                                                                            |
| 5 mg BID                | China          | 38                             | F          | 822                  | No                                       | Pulmonary/pleural   | QFT negative                              | Effusion AFB smear negative. No cultures done | Yes                 | No                | CXR with infiltrate                                                                                        |

| Tofacitinib dose | Country     | Age at time of TB onset | Sex | Days to onset | Meets CDC TB criteria <sup>a</sup> | TB location     | TB screening | Bacteriology                         | Methotrexate | Prednisone | Other                                          |
|------------------|-------------|-------------------------|-----|---------------|------------------------------------|-----------------|--------------|--------------------------------------|--------------|------------|------------------------------------------------|
| 10 mg BID        | Spain       | 64                      | F   | 845           | Yes                                | Disseminated    | QFT positive | Not reported                         | No           | No         | MRI brain c/w TB, milia on chest CT            |
| 10 mg BID        | Korea       | 42                      | F   | 867           | Yes                                | Lymphadenitis   | QFT negative | PCR+ node                            | Yes          | No         |                                                |
| 5 mg BID         | Korea       | 61                      | F   | 960           | Yes                                | Disseminated TB | QFT negative | Positive DNA M Tb bone aspirate      | Yes          | No         | Encephalitis, pulmonary and spinal involvement |
| 10 mg BID        | Ukraine     | 59                      | F   | 964           | No                                 | Pulmonary       | QFT negative | AFB smear + sputum, culture not done | Yes          | Yes        | CXR with infiltrate                            |
| 10 mg BID        | India       | 53                      | F   | 1031          | No                                 | Pleural         | QFT negative | None                                 | Unknown      | Unknown    |                                                |
| 10 mg BID        | Poland      | 78                      | F   | 1086          | Yes                                | Scrofula        | QFT negative | TB PCR+ cervical lymph node          | Yes          | No         |                                                |
| 10 mg BID        | Philippines | 57                      | F   | 1126          | No                                 | Pulmonary       | QFT negative | AFB sputum smear negative            | No           | Yes        | No cultures done. CXR with infiltrate          |

<sup>a</sup>US Centers for Disease Control and Prevention[1];

ADA, adenosine deaminase; AFB, acid-fast bacilli; BID, twice daily; CDC, Centers for Disease Control; CT, computed tomography; CXR, chest radiograph; F, female; LTE, long term extension; M, male; MRI, magnetic resonance imaging; PCR, polymerase chain reaction; PPD, purified protein derivative; QFT, QuantiFERON<sup>®</sup> In-tube; TB, tuberculosis; TST, tuberculin skin test

## References

1 Centers for Disease Control and Prevention. Tuberculosis (TB) 2009 Case Definition. Available at:

<http://www.cdc.gov/NNDSS/script/casedef.aspx?CondYrID=876&DatePub=1/1/2009> 12:00:00 AM. Accessed October, 2014.
